1  
2  
3  
4  
5  
6  
7  
8  
9  
10  
11  
12  
13  
14  
15  
16  
17  
18  
19  
20  
21  
22  
23  
24  
25

**TITLE:** Bangladesh should engage the private sector for malaria elimination by 2030

**Authors:** Ryan Patrick McArdle<sup>1</sup>, BA; Ching Swe Phru<sup>2</sup>, MBBS; Mohammad Sharif Hossain<sup>2</sup>, Ph. D; Mohammad Shafiul Alam<sup>2\*</sup>, Ph. D; and Kasturi Halidar<sup>1,3\*</sup>, Ph. D

**Affiliations:**

- <sup>1</sup> Boler-Parseghian Center, Department of Biological Sciences, University of Notre Dame
- <sup>2</sup> Infectious Diseases Division, International Center for Diarrheal Disease Research, Bangladesh
- <sup>3</sup> Eck Institute for Global Health, University of Notre Dame

\* Corresponding author

**Full Addresses:**

Dr. Mohammad Shafiul Alam, Infectious Diseases Division, International Center for Diarrheal Disease Research, Bangladesh, Mohakhali, Dhaka-1212, Bangladesh  
Email: [shafiul@icddr.org](mailto:shafiul@icddr.org) Phone +88 02 9827001-10; Extn.2480

Dr. Kasturi Halidar, Boler-Parseghian Center, Eck Institute of Global Health, Department of Biological Sciences, University of Notre Dame, Notre Dame IN 46556  
Email: [khaldar@nd.edu](mailto:khaldar@nd.edu) Phone +1 574-302-6827

26 **ABSTRACT:**

27

28 Bangladesh reduced malaria by 93% from 2008-2020 through the action of governmental and  
29 non- governmental organizations, yet ~18 million people continue to live at risk of infection. For-  
30 profit private healthcare providers, catalytic for malaria elimination in many countries, have not  
31 yet been integrated into the national program. By imposing strict definitions on a large and  
32 complex literature surrounding private healthcare sector engagement, we distilled eight distinct  
33 strategies important in other developing settings: contracting, financing, subsidization,  
34 regulation, social franchising, demand-side interventions, infrastructure-building and training.  
35 We weighed these in the context of Bangladesh’s flourishing private health care sector—driven  
36 by patient demand, self-interest, and aspirations for public good—as well as the heterogeneity in  
37 provider capacity and malaria prevalence across districts. We developed a new model dependent  
38 on five strategies of subsidization, training, infrastructure building, demand-side intervention,  
39 and referral financing, to empower Bangladesh’s phased agenda of eliminating indigenous  
40 malaria transmission by 2030.

41

42 **INTRODUCTION**

43 Malaria remains one of the deadliest communicable diseases worldwide, claiming an estimated  
44 627,000 lives in 2020 and leaving almost 50% of the world’s population at risk of contracting the  
45 disease. Despite this, malaria is treatable, and recent epidemiologic and pharmaceutical advances  
46 have allowed the complete elimination of malaria from 40 countries overall and 13 since the turn  
47 of the century.<sup>1</sup>

48

49 Among the remaining malaria-endemic countries, Bangladesh has experienced remarkable recent  
50 success in the control of malaria. Historically, Bangladesh suffered from a high malaria burden,  
51 and initial disease control efforts in the 1960s, which focused on the use of  
52 dichlorodiphenyltrichloroethane (DDT) to eliminate mosquito vectors,<sup>2</sup> were disrupted by the  
53 cyclone of 1970, the Banglaeshi War of Liberation, and the international ban on DDT. In 2008,  
54 however, the National Malaria Elimination Program (NMEP) and a consortium of NGOs headed  
55 by the Bangladesh Rural Advancement Committee (BRAC) began revitalizing malaria control  
56 efforts within the country.<sup>3</sup> This renewed strategy combined the mass distribution of long-lasting  
57 insecticide nets (LLINs) to reduce bites from malaria-transmitting mosquitos, in-home review of  
58 appropriate net use, rapid point-of-care diagnosis, and prompt treatment with frontline  
59 artemisinin-based combination treatments (ACTs; Fig. 1). This strategy has allowed the country  
60 to achieve near-elimination status in 8 of its 13 malaria-endemic regions (Fig. 2a and 2b);<sup>3</sup>  
61 likewise, malaria case and death rates within the country decreased up to 2020 (Fig. 2c).<sup>3</sup> This  
62 rapid progress prompted Bangladesh to set the ambitious target date of 2030 for the scaled  
63 elimination of malaria from the country.

64  
65 However, several challenges persist. Three high-transmission districts (Bandarban, Rangamati,  
66 and Khagrachari) remain in the Chittagong Hill Tracts (CHTs; Fig. 2), a region which in 2021  
67 and 2022 showed increases in malaria incidence (Fig. 2c-d), posing significant challenges for  
68 continued elimination efforts.<sup>3</sup> These districts are poorly served by roads and transportation,  
69 which are necessary for the national program's healthcare workers to comprehensively access  
70 homes, deliver point-of-care diagnosis and treatment, and ensure proper use of LLINs throughout  
71 all subdistricts. These districts also feature a high proportion of remote communities of isolated,  
72 Indigenous (non-Bengali) peoples, presenting cultural practices that compound geographical

73 barriers to prevent access for malaria elimination programs.<sup>4,5</sup> In contrast, two low-endemic  
74 districts, Cox's Bazar and Chittagong, are more accessible to present control efforts. These  
75 regions plan to eliminate the endogenous transmission within the districts by 2025, but will  
76 continue to face the prospect of imported malaria due to high levels of human travel from the  
77 neighboring high-transmission CHT districts until the 2030 elimination date.<sup>6</sup> Eight northeastern  
78 districts at near-elimination present only a few cases of malaria annually. Here, there is concern  
79 that because risk of infection is lowered, LLINs are not consistently utilized. LLINs also may not  
80 protect agricultural workers in tea gardens.<sup>7</sup>

81  
82 One important task for the malaria elimination program in Bangladesh is to better involve the  
83 forprofit private healthcare sector into malaria elimination efforts. So-called private sector  
84 engagement (PSE) has in recent years become a point of emphasis within both regional and  
85 global malaria elimination programs due to the large proportion of patients who seek care from  
86 private healthcare providers (PHPs).<sup>8,9</sup> This high utilization of the private healthcare sector holds  
87 true also in Bangladesh, where in some endemic regions private healthcare providers represent  
88 over 97% of all healthcare available.<sup>10</sup> Global trends in the epidemiology of malaria and other  
89 diseases near or at elimination, such as draculaniasis and smallpox, suggest that as malaria  
90 elimination in Bangladesh advances, an increasing fraction of disease cases will begin to localize  
91 amongst difficult to reach subpopulations; as PHPs oftentimes have greater reach than public  
92 entities, it will be essential to find ways to include them in the broader movement towards  
93 malaria elimination within the country.<sup>11-13</sup> In addition, current data from Bangladesh finds that  
94 only 80% of malaria diagnosis and treatment in Bangladesh occurs within the national program  
95 (see Fig. 1), suggesting as much as 20% of patients seek care from PHPs. While malaria is a

96 notifiable disease in Bangladesh,<sup>14</sup> many PHPs are unaware of this fact, resulting in serious  
97 underreporting; this poses a barrier to WHO certification of malaria elimination, which requires  
98 proof of a comprehensive surveillance system.<sup>15</sup> In addition, untrained private providers, who  
99 often prove difficult to regulate, have been shown to provide ineffective management of malaria  
100 cases in other developing settings,<sup>16</sup> threatening to increase both malaria deaths and antimalarial  
101 resistance. Thus, in order to meet the 2030 target date for malaria elimination, malaria control  
102 efforts in Bangladesh will require robust incorporation of PHPs into existing surveillance  
103 networks, granting PHPs the ability to aid in case detection and requiring them to refer  
104 confirmed-positive cases to public treatment frameworks.

105  
106 This policy review aims to collate and analyze the strategies used for PSE elsewhere in the  
107 literature, weighing them in the context of challenges facing malaria elimination in the high-  
108 transmission districts of the CHTs as well as in the low-transmission and near-elimination  
109 districts, and develop a multi-modal plan to suggest the most promising path for PSE in  
110 Bangladesh.

111  
112 **METHODS:**

113 **LITERATURE REVIEW.** To the extent that the literature allowed, this study limited its scope to  
114 low- and middle-income countries (LMICs). The study also focused on efforts to engage the for-  
115 profit private sector in healthcare delivery at the local level; studies on the engagement of larger  
116 international private entities, such as drug manufacturers, were largely excluded. Primary  
117 concern was given to literature on PSE directly in the context of malaria elimination and to  
118 studies in a Bangladeshi context; however, due to a relative absence of studies for many  
119 strategies, evidence from other health initiatives and settings was consulted, including grey

120 literature. This study also excludes data on the BRAC-led NGO consortium; as indicated earlier,  
121 BRAC and its subsidiary NGOs have been closely integrated into modern public malaria  
122 elimination efforts from their inception, and their status as nonprofit entities causes them to  
123 respond to different factors than for-profit PHPs. Due to the breadth of literature on private sector  
124 engagement as a whole, this paper also gave preference to existing literature reviews where  
125 possible over a review of the primary literature itself.

126

127 Sources were discovered using the search tool of Google Scholar; Google Scholar was selected  
128 over other databases due to its ability to probe both white and grey literature. Preliminary  
129 research revealed several distinct strategies for private sector engagement: “contracting”,  
130 “financing” (including “pay for performance”, “rewards system”, and “referral system”),  
131 “subsidization”, “franchising” (including “accreditation” and “certification”), “regulation”,  
132 “demand-side” interventions (including “social marketing”, “public awareness campaigns”,  
133 “mass media campaigns”, and “community mobilization”), “infrastructure-building strategies”  
134 (including  
135 “public-private partnership”), and “training”. Each of these areas was thoroughly queried; full  
136 search terms are available in the supplemental materials. Only source published in English were  
137 reviewed. Following the guidelines listed in Bramer 2019, 100 sources were included for each  
138 collection of search terms before deduplication.<sup>17</sup> Identified sources were also supplemented by  
139 lists of sources derived from existing review papers.<sup>9,18,19</sup>

140

141 THE BANGLADESH CONTEXT. The Bangladeshi context was initiated through a combination  
142 of published literature in Bangladesh, insights from informal conversations with malaria  
143 elimination experts from NMEP and BRAC, and focus group discussions with private healthcare  
144 Providers.<sup>3-7,20</sup>

145

## 146 **RESULTS.**

### 147 **STRATEGIES FOR PRIVATE SECTOR ENGAGEMENT BASED ON MOTIVATION.**

148 As summarized in Fig. 3, literature searches performed between October 1, 2022 and January 31,  
149 2023 revealed 3,026 sources. Of these results, 818 were duplicates, leaving 2,208 sources after  
150 deduplication. Of these, 235 sources (including full-length articles, NGO and governmental  
151 reports, and books) were reviewed and included in this policy review (a full list of all sources can  
152 be found in the supplemental materials). Since the high transmission CHT districts have the  
153 highest need for new approaches to reduce malaria, we queried the data to find that only seven of  
154 235 sources referenced CHTs and even those did not provide in-depth accounts of strategies used  
155 to engage PHPs; this suggests that an assessment of PSE strategies reported elsewhere and an  
156 application of lessons learned to the engagement private malaria providers in the CHTs is an area  
157 of high unmet need. Indeed, our literature search revealed zero sources analyzing the engagement  
158 of for-profit private sector healthcare providers with the NMEP in the CHTs (Fig. 3). Similarly,  
159 we were unable to find studies reporting on PSE in low-endemic and near-elimination districts.  
160 We therefore assessed the remaining 235 sources, identify eight distinct strategies of contracting,  
161 financing, subsidization, social franchising, regulation, demand-side interventions, infrastructure-  
162 building strategies, and training (Fig. 4). A review of the Bangladeshi private healthcare sector  
163 revealed three primary motivators for private healthcare providers: provider self-interest, patient

164 demand, and altruism (concern for patient good). Four mechanisms (reward, punish, building  
165 infrastructure, building knowledge) that connect strategies to motivation are also shown.

166

167 In Fig 4, the first set of strategies appeal to the self-interest of private providers. Assuming that  
168 PHPs lack adequate incentives to comply with public health mandates, these strategies seek to  
169 impose either punishments (“regulation”) or rewards (“contracting”, “financing”,  
170 “subsidization”, and “social franchising”) to alter the behavior of PHPs driven by self-interest.

171 The second set of strategies target the well-documented reliance of PHPs on patient demand. By  
172 seeking to modify patient demand for specific services, these so-called “demand-side  
173 interventions” act as indirect modifiers of provider behavior. The final set of strategies address  
174 inherent concern for the public good among PHPs. Unlike the other strategies, this category  
175 assumes that providers have inherent motivation to aid in public health programs but lack the  
176 ability to do so. By building either technical and organizational infrastructure (“infrastructure-  
177 building strategies”) or knowledge (“training”), these strategies aim to empower previously-  
178 motivated PHPs to aid in disease elimination efforts.

179

## 180 **HETEROGENEITY IN THE BANGLADESH PRIVATE HEALTHCARE SECTOR:**

181 Though relatively unstudied, evidence suggests that Bangladesh features a large private  
182 healthcare sector. The Bangladeshi private healthcare sector is also heterogenous, marked by the  
183 presence of both formal and informal providers. Formal providers, who have been trained and  
184 registered through official government channels, include private hospitals and private healthcare  
185 provided to employees by corporations; on the other hand, informal providers, who either have  
186 no formal medical training or have not registered their practice with the government, include



187 untrained drug vendors, traditional healers such as religious, ayurvedic, and homeopathic  
188 therapists, and even formally-trained physicians who have unregistered clinics in addition to their  
189 public practice.<sup>9,21</sup>

190

191 Several recent qualitative studies on the motivations of PHPs in Bangladesh and in Southeast  
192 Asia more broadly provide excellent insights into the environment in which the Bangladeshi  
193 private healthcare sector operates.<sup>20,22</sup> PHPs in Bangladesh must compete with cheaper but often  
194 overcrowded public healthcare options; as a result, the for-profit private sector finds a  
195 competitive advantage in its high responsiveness to patient demand and prioritizes the  
196 maintenance of strong personal relationships with patients. The for-profit private sector in  
197 Bangladesh also features a rich referral network, both from the public sector and between  
198 providers in the for-profit private sector; referral fees, which constitute a financial compensation  
199 paid to the referring practitioner, are common practice. Pharmaceutical representatives are also  
200 reported to have an outsized influence on the products available in local drug stores and on the  
201 prescription practices of private physicians due to their widespread provision of incentives,  
202 including direct payments and the provision of free product, to PHPs. In summary, PHPs in  
203 Bangladesh operate within a highly informal, complex marketplace, and their decisions are  
204 driven by a combination of internal and external factors including self-interest, patient demand,  
205 and, in some cases, concern for the public good.<sup>20</sup>

206

## 207 **ASSESSMENT OF EIGHT STRATEGIES OF PSE IN THE BANGLADESH CONTEXT.**

208 *CONTRACTING*: Contracting entails the direct employment of private healthcare providers  
209 (PHPs) for the delivery of specific healthcare services. In contracting, PHPs are usually hired as

210 full-time employees who exclusively perform contracted activities.<sup>23</sup> Despite strong theoretical  
211 appeal driven by the perceived efficacy of the market, contracting for healthcare delivery has in  
212 practice had mixed results. Although several individual studies and one review reported positive  
213 outcomes,<sup>23–25</sup> multiple systematic reviews have found that existing positive evidence for  
214 contracting is low-quality and that when proper study design was followed, there was little  
215 evidence that contracting programs have any effect on targeted health outcomes.<sup>19,26–28</sup>  
216 Nevertheless, even critics acquiesce that contracting remains a feasible strategy when used to  
217 expand health services in settings where existing public health infrastructure is unable to meet  
218 patient demand.<sup>27</sup>

219  
220 Contracting represents a poor solution in the Bangladeshi context. Bangladesh already features a  
221 comprehensive public system for malaria treatment, negating the positive effects that contracting  
222 can have when used to expand healthcare access. In addition, malaria cases in Bangladesh are too  
223 low to justify hiring networks of private providers as full-time malaria workers, leaving  
224 contracting strategies financially infeasible.

225  
226 *FINANCING*. Like contracting, financing provides direct financial incentives as a mechanism to  
227 spur private sector engagement; however, instead of fully employing PHPs for a salary, financing  
228 efforts simply incentivize desired outcomes by providing smaller monetary rewards to PHPs.<sup>29</sup>  
229 Financing, which is synonymous with “pay-for-performance” (P4P), has been used widely and  
230 features an extensive body of literature. Despite this, evidence for the success of P4P programs as  
231 a whole is mixed, both amongst individual studies and reviews.<sup>19,30–36</sup> However, evidence does  
232 seem to suggest certain criteria shared by successful P4P programs. In general, highly tailored  
233 P4P programs which use a carefully-measured incentive to target specific providers and

234 healthcare outcomes have enjoyed higher degrees of success;<sup>31,34,35</sup> successful programs have  
235 also taken particular care to integrate routine evaluation in order to avoid the potential  
236 unintended consequences of incentivization.<sup>31,33,34</sup>

237  
238 In the context of disease elimination, P4P strategies can be used to incentivize the reporting of  
239 disease cases to centralized surveillance networks. Practical applications of such rewards systems  
240 suggest that they can be effective, albeit often through the use of low-quality evidence.<sup>12,37-40</sup> In  
241 one of the stronger pieces of evidence, a systematic review of several PSE strategies reported that  
242 referral rewards systems represented the most effective strategy studied and resulted in positive  
243 changes in provider behavior 84% of the time.<sup>18</sup> Rewards systems must be accompanied by  
244 appropriate strengthening of infrastructure, as timely repayment is vital to PHP buy-in;<sup>41</sup>  
245 nevertheless, they represent a potentially useful solution for disease programs.

246  
247 Financing has high potential as a mechanism for incentivizing small, informal providers in  
248 Bangladesh. In particular, referral fees, or the provision of a small financial reward for the  
249 referral of malaria-positive patients whose diagnosis is confirmed at public clinics, represents a  
250 highly targeted, direct manner of incentivization. Such a system could be structured similarly to  
251 that reported in Vo et al., where PHPs in Vietnam were given a cash reward for reporting  
252 confirmed-positive tuberculosis cases to the public surveillance system.<sup>40</sup> In fact, the provision of  
253 referral fees is already standard practice amongst members of the Bangladeshi private healthcare  
254 sector, as it helps the referring PHP to offset the lost revenue from treating a patient. Because of  
255 this, such a referral reward system may be necessary to achieve any desirable degree of  
256 compliance with government referral mandates.

257

258 *REGULATION*. Rather than providing incentives for compliance with public health objectives,  
259 regulation functions by imposing legal punishments for noncompliance.<sup>21</sup> The success of  
260 regulation largely depends on the capacity for enforcement.<sup>42</sup> Where enforcement networks are  
261 strong, regulation has generally proven successful;<sup>37,43</sup> more often, however, regulatory strategies  
262 in developing settings face much weaker enforcement support and, as a result, much more  
263 modest results.<sup>42–46</sup> While limited, evidence suggests that regulation of PHPs has been similarly  
264 ineffective in Bangladesh.<sup>47</sup> Regulatory strategies face the additional risk of unintended  
265 consequences; in particular, highly stringent regulations threaten to reduce healthcare access for  
266 vulnerable populations.<sup>45,48</sup>

267

268 Other regulatory efforts have focused on “self-regulation”, an arrangement in which the powers  
269 and duties of enforcement are delegated to regulatory bodies composed of members of the for-  
270 profit private sector.<sup>46</sup> Despite appeal as a hands-free mechanism for enforcement,<sup>45</sup> self-  
271 regulatory efforts have been equally ineffective, largely because of both a lack of proper  
272 resources and “regulatory capture”, a well-documented phenomenon in which self-regulatory  
273 boards use their power for personal benefit.<sup>19,44–46</sup>

274

275 Although malaria is a public health notifiable disease in Bangladesh,<sup>14</sup> regulation is unlikely to  
276 form a successful strategy for PSE within the country; in addition to inefficacy in other  
277 developing settings, current regulations in Bangladesh are complicated by poor enforcement  
278 networks, an issue which would only be further complicated by the geographical remoteness of  
279 remaining malaria hotspots.

280

281 *SUBSIDIZATION.* Subsidization provides free or discounted medications or supplies to PHPs to  
282 overcome the cost barriers that may prevent their full engagement with public health priorities.  
283 Subsidization provides no direct positive incentive to PHPs, instead removing cost barriers that  
284 can present negative incentives to engagement. Subsidization has been used widely in the context  
285 of malaria control and elimination efforts, both for direct treatments (i.e. artemisinin combination  
286 therapies, or ACTs) and for diagnostic methods (i.e. rapid diagnostic tests, or RDTs). Most  
287 evidence for ACT subsidization has come from the Affordable Medicines Facility-malaria  
288 (AMFm) program, an international cooperation which allowed pharmaceutical wholesalers in  
289 developing countries to purchase ACTs directly from manufacturers at reduced cost.<sup>49</sup> Despite  
290 concerns of negative residual effects from some commentators,<sup>50</sup> the AMFm program has proven  
291 largely successful at increasing access to and use of ACTs.<sup>9,49,51</sup>

292

293 RDT subsidization efforts have been fewer in number, and their results have been more mixed.  
294 Both individual studies and a systematic review provide unclear evidence as to whether RDT  
295 subsidies represent an effective mechanism for either reducing antimalarial over-prescription or  
296 increasing RDT access and usage, although results for both were generally better when RDT  
297 subsidies were higher.<sup>52-55</sup> However, other commentators have argued against large subsidies,  
298 noting that the subsidized RDT price must preserve the ability of private providers to generate a  
299 reasonable profit.<sup>56</sup>

300

301 Overall, this data suggests that subsidization efforts are perhaps best evaluated on a case-by-case  
302 basis and must take particular caution to fully investigate both the incentives facing providers

303 and the potential unintended consequences of interventions. Nevertheless, subsidization, and in  
304 particular the subsidization of RDTs, presents a promising solution for Bangladesh. Subsidized  
305 RDTs could help to encourage PHPs to test a greater proportion of their patients, and subsidizing  
306 high-quality, WHO-certified tests could help to crowd out lower-quality RDTs from the market.

307  
308 *SOCIAL FRANCHISING.* In social franchising strategies, for-profit private sector providers bear  
309 the brand of the franchising organization, agreeing to operate under some sort of regulatory  
310 structure and in some cases to pay fees to the coordinating body. In return, franchises offer PHPs  
311 both the “hard” incentive of access to cheaper, higher-quality drugs and the “soft” incentives of  
312 increased credibility from accreditation or certification programs and increased clientele volume  
313 through marketing strategies.<sup>57</sup>

314  
315 Evidence from a variety of health initiatives suggests that social franchising efforts have been  
316 successful in improving the quality of care of private providers, client satisfaction, and client  
317 knowledge of health conditions.<sup>19,58,59</sup> However, social franchising strategies as a whole have  
318 struggled to improve health outcomes and healthcare utilization on a community level due to  
319 their increased price.<sup>45,58–60</sup> This shortcoming makes social franchising strategies as a whole  
320 particularly poorly suited for malaria elimination in Bangladesh, where the majority of cases are  
321 concentrated amongst rural laborers.

322  
323 However, one component of social franchising strategies may be particularly relevant to malaria  
324 programs in Bangladesh: certification. In certification strategies, an organizing body grants PHPs  
325 some sort of endorsement for meeting specific guidelines or standards.<sup>19,61</sup> Evidence for

326 independent accreditation and certification programs is generally positive, and seems to support  
327 the assertion that accreditation and certification can improve quality of care.<sup>19,46,62</sup>

328  
329 In the Bangladeshi context, certification presents a promising incentive for PHPs to receive  
330 training and comply with guidelines. Informal private providers are oftentimes eager to gain  
331 credibility within the community,<sup>46</sup> and the increased authority from an official NMEP  
332 certification could present a valuable incentive for PHPs to attend training sessions and comply  
333 with public health guidelines.

334  
335 *DEMAND-SIDE INTERVENTIONS.* Perhaps the largest determinant of PHP behavior is  
336 consumer demand; in order to maintain clientele in spite of cheaper public healthcare options,  
337 PHPs must carefully align their services with patient desires. As a result, demand-side  
338 interventions, which seek to modify the healthcare-seeking behavior of patients, represent a  
339 promising solution to change the incentives, and thus the behavior, of PHPs.<sup>18,20,45</sup> Demand-side  
340 interventions take a number of forms, including social marketing, public awareness campaigns,  
341 mass media campaigns, and community mobilization. Because these categories present a fair  
342 degree of overlap and a comprehensive review of each is beyond the scope of this paper, their  
343 efficacy will be analyzed collectively.

344  
345 Most evidence for demand-side interventions is weak; despite this, when taken together, evidence  
346 seems to support the potential for demand-side interventions to improve patient knowledge and  
347 awareness and to modify patient behavior, potentially improving demand for health

348 services.<sup>19,34,63-68</sup> While standalone demand-side interventions have struggled to improve health  
349 outcomes, most patient-facing strategies do nothing to improve healthcare quality.<sup>63,64,68</sup>  
350 Characteristics associated with successful demand-side interventions include sufficient exposure  
351 to patient communities,<sup>66</sup> careful integration with the existing context,<sup>67</sup> and continual  
352 reinforcement.<sup>68</sup>

353  
354 Demand-side interventions have been less-studied in the context of private sector engagement.  
355 While it is generally well-established that demand-side interventions can improve patient demand  
356 for specific health services and that private providers are highly responsive to patient demand,  
357 only a small, albeit positive, body of research supports the direct effects of demand-side  
358 interventions on PHP behavior.<sup>18,30,65</sup> Nevertheless, demand-side interventions pose a promising  
359 strategy for malaria elimination efforts in Bangladesh, particularly when combined with  
360 certification programs: if demand-side interventions could successfully convince patient  
361 communities to value the certification, it would only further improve the likelihood that private  
362 providers would value certification. Demand-side interventions would have the added benefit of  
363 raising the public profile of malaria elimination efforts and helping to ensure patients would  
364 follow through with referrals to public clinics.

365  
366 *INFRASTRUCTURE-BUILDING STRATEGIES.* For providers motivated by a concern for the  
367 public good, PSE may be as simple as building greater avenues for communication and  
368 cooperation between public and private entities; this paper will refer to these efforts as  
369 “infrastructure-building strategies”. Some of the most common manifestations of infrastructure-  
370 building are public-private partnerships (PPP). In the context of disease elimination, PPPs



371 normally entail agreements between public health institutions and large businesses in which both  
372 parties agree to share the costs and burdens of disease elimination efforts, including vector  
373 control, testing, and treatment.<sup>69</sup> Businesses have inherent motivation to engage in public health  
374 programs, benefiting both directly from a healthier workforce and indirectly from the increased  
375 “social license” that arises from helping to tackle health issues in local communities;<sup>69</sup> as a result,  
376 businesses are often willing to share the costs of disease elimination efforts. Despite a high risk  
377 of bias due to funding sources, most PPP programs report sweeping successes.<sup>69,70</sup>

378  
379 Beyond its use as a primary form of engagement with large businesses, infrastructure-building  
380 can be thought of more broadly as a foundational strategy for all other PSE efforts on an as-  
381 needed basis. Successful PSE programs require both technical support, such as supply chain  
382 integration and the construction of novel data platforms for case reporting, and organizational  
383 support, such as forging strong connections with local leadership.<sup>31,67,71</sup>

384  
385 In the Bangladeshi context, infrastructure-building strategies present an appealing and necessary  
386 intervention. Where large industry is present, such as in the low-transmission and near-  
387 elimination districts, companies could be asked to either provide testing and refer cases to the  
388 National Malaria Elimination Program themselves or house an NMEP-trained health worker. In  
389 addition, given the variation in social and economic conditions across malaria-endemic districts,  
390 special consideration should be given to ensure that all PSE efforts in Bangladesh are  
391 accompanied by adequate technical and organizational support.

392

393 *TRAINING:* Even in situations where PHPs have the motivation and required infrastructure to  
394 support public health programs, they oftentimes lack the skills and knowledge needed to  
395 successfully comply with public health mandates;<sup>72</sup> this is especially true in Bangladesh, where  
396 many PHPs operate informally and lack formal medical education. Training seeks to fill this gap,  
397 providing PHPs with the technical tools needed to aid in disease control efforts. Because of the  
398 clear necessity of an educated workforce, training is the most popular of all PSE strategies,  
399 representing over 70% of all interventions by some estimations.<sup>9,18</sup>

400  
401 Evidence for the impact of independent training programs has been largely mixed.<sup>18,29,72-75</sup> There  
402 is some evidence that pre-service training, which occurs before a PHP begins rendering service,  
403 is more effective than in-service training;<sup>72,73</sup> as a whole, however, there is little agreement on  
404 whether training initiatives on their own can have a significant impact on PHP behavior. One  
405 potential explanation for this heterogeneity is the common admission that training initiatives  
406 work best in combination with other strategies and are best viewed as a complementary measure  
407 and can lead to positive outcomes when properly implemented.<sup>9,18,29,45,72,73</sup> Key elements of  
408 successful training initiatives include continual reinforcement,<sup>72,73</sup> well-trained trainers,<sup>18,73</sup> and  
409 interactive training programs.<sup>73</sup>

410  
411 Training represents an essential complementary strategy to any PSE efforts in Bangladesh. The  
412 informal nature of many private providers and high rate of turnover amongst PHPs necessitates  
413 frequent training and informational campaigns targeted towards providers. If PHPs are asked to  
414 test patients and refer cases, training on both proper testing methodology and case referral

415 practices will be necessary to ensure the success of those programs. Training could also be easily  
416 accompanied by the provision of a certification to increase its apparent value to PHPs.

417

#### 418 **RECOMMENDED MODEL FOR PRIVATE SECTOR ENGAGEMENT IN**

419 **BANGLADESH:** Based on our findings, we recommend a two-step, multimodal model to  
420 optimize for-profit private sector engagement in Bangladesh (Fig. 5). As phase one of our  
421 intervention, we recommend the provision of free or subsidized RDTs to PHPs to ensure  
422 adequate testing and the training of providers on both proper RDT usage and case reporting  
423 (preferably through electronic reporting methods); successful completion of both by PHPs may  
424 be accompanied by the provision of an official certification. These initial steps, which should be  
425 simpler to implement, address the urgent nationwide need for greater knowledge and usage of  
426 current testing and referral protocols. As a second phase, and pursuant to the outcomes of the  
427 first, we recommend broadening campaigns to increase patient demand for providers with a  
428 government-sponsored certification, the provision of cash rewards to PHPs upon the referral of a  
429 confirmed positive case, and a continuing strengthening of the partnerships and logistics required  
430 to ensure program success.

431

432 We recommend this stepwise but multimodal model due to the strength of evidence supporting  
433 multifaceted PSE programs.<sup>8,9,29,45,66,75</sup> In one systematic review of strategies oriented towards  
434 informal PHPs, Shah et al. 2011 note that the average percentage of positive outcome measures  
435 rises steadily as the number of strategies employed by a program increases, doubling from 44%  
436 for interventions that used only a singular strategy to 88% for interventions that use 4.<sup>18</sup> A

437 multimodal model is also necessitated by the heterogeneity of motivation amongst PHPs in  
438 Bangladesh, all of which are targeted under our model.

439

440 While our findings suggest this general model for Bangladesh, the subdistrict and district-wise  
441 context will likely necessitate a phased application in the different malaria-endemic regions of  
442 the country. In the high-endemic districts of the CHTs, where there is urgent need to decrease  
443 malaria levels but the number of private providers maybe lower and a larger majority may be  
444 informal providers, immediate focus should rest on training providers to conduct diagnosis with  
445 RDTs and enter data into formats needed by the national program. Successful utilization of RDTs  
446 should be followed by infrastructure-building, and in particular efforts to improve connections  
447 with local leadership; stronger relationships between local leaders, PHPs, and the NMEP will be  
448 required to successfully target patient demand. Additionally, certification of trainers after proven  
449 performance could serve as a pre-requisite for the receipt of referral financing. In sum, malaria  
450 elimination efforts in the CHTs should focus on efforts to build both technical and organizational  
451 infrastructure in the immediate term.

452

453 In low-endemic regions such as Chakaria and Cox's Bazar and the near-elimination settings of  
454 the northeastern districts, infrastructure is already sufficient to ensure that the other components  
455 of the model will have the logistical support and local partnerships necessary for success; as a  
456 result, the application of the other portions of the model in these regions should be able to  
457 proceed relatively unimpeded.

458

459 **SUMMARY:** For-profit private sector healthcare providers have not been incorporated into

460 Bangladesh's public-sector malaria elimination efforts, namely the National Malaria Elimination  
461 Program and its NGO partners such as BRAC and its associated consortia. However, our findings  
462 and analyses show that PSE will be an important tool for strengthening malaria surveillance and  
463 treatment networks as the country works towards elimination. This study distilled a voluminous  
464 literature to establish precise definitions for eight individual strategies for private sector  
465 engagement, weighing each based on the evidence provided in the literature and its applicability  
466 for Bangladesh. Based on this analysis, we recommend a phased, multi-modal model in which  
467 the first step combines RDT subsidization with rigorous provider training in high- and low-  
468 transmission as well as near-elimination settings. Subsequently we recommend that referral  
469 fees, which represented the most effective individual strategy studied, and possibly certification,  
470 infrastructure building, and demand-side intervention be introduced to better engage the private  
471 healthcare sector in malaria elimination efforts.

472

#### 473 LIMITATIONS:

474 Given the relative lack of evidence, this study did not analyze private sector engagement with  
475 regards to gender dynamics, which may limit its applicability. This study was also limited to  
476 sources in English, with the small exception of a few sources in Bangla for which translations  
477 could be provided.

478

#### 479 DATA SHARING STATEMENT:

480 This study aims to provide full data transparency. A full list of search terms and sources included  
481 in the literature review can be found in the supplemental materials. All other inquiries for data  
482 sharing can be directed to the

483 corresponding author.

484

485 ETHICS STATEMENT:

486 No participant data was used in the formulation of this manuscript.

487 **Figures:**

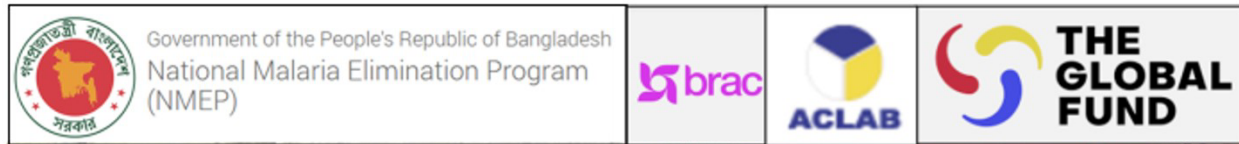

489 **Figure 1. Malaria Elimination in Bangladesh.** Supported by the Global Fund, the Govt of Bangladesh's National  
490 Malaria Elimination Program (NMEP) works in conjunction with the NGO BRAC as well as others such as ACLAB  
491 (Alliance for Cooperation and Legal Aid Bangladesh). LLINs (long-lasting insecticide nets; indicated in (a) and (b))  
492 are issued for use to prevent mosquito biting at night or rest periods. A paid, trained, high-school graduate, female  
493 health care community supervisor or Sasthya Kormi (SK; depicted seated in (b)) visits with a homesteader (Hstd;  
494 depicted standing in (b)) to ascertain appropriate use of nets and the number of family members protected under  
495 them and to remind Hstds of the longer-term maintenance of the LLIN over the expected 3-year life span. The SK  
496 also queries about recent fevers of and travel by family members. Reports of fever over the prior 24-48 hours are  
497 rapidly followed up by an in-home RDT. If negative, affected individuals are given a written referral to a local health  
498 clinic for further follow up. Severe patients are immediately sent to a suitable clinic or hospital. Patients positive  
499 for *P. falciparum* or *P. vivax* with uncomplicated malaria are directly started on appropriate antimalarial drug  
500 treatment by the SK. The SK keeps contact via cell phone at the times of all subsequent doses (~8 h apart) to check  
501 on the patient and compliance. In addition, she visits in-person each day that the patient continues to be febrile.  
502 Conversely, febrile or otherwise-ill patients also directly call their SK for an immediate home visit, RDT, drug  
503 treatment and collection of clinical history and travel data. All this information as well as the spent RDTs are  
504 transferred to the NGO and NMEP. 80% of all malaria infections in Bangladesh are identified by SK's or Sasthya  
505 Sebikas (who report to SK's and do not administer antimalarial drugs unsupervised). The result is high-quality,  
506 accountable, patient-centered care, with collation of rich natural history data at a national scale to inform the malaria  
507 elimination agenda, as well as empowerment of community health workers who are aware of the central role they  
508 play in Bangladesh's success in diminishing malaria as well as supporting the general health of their communities.

509

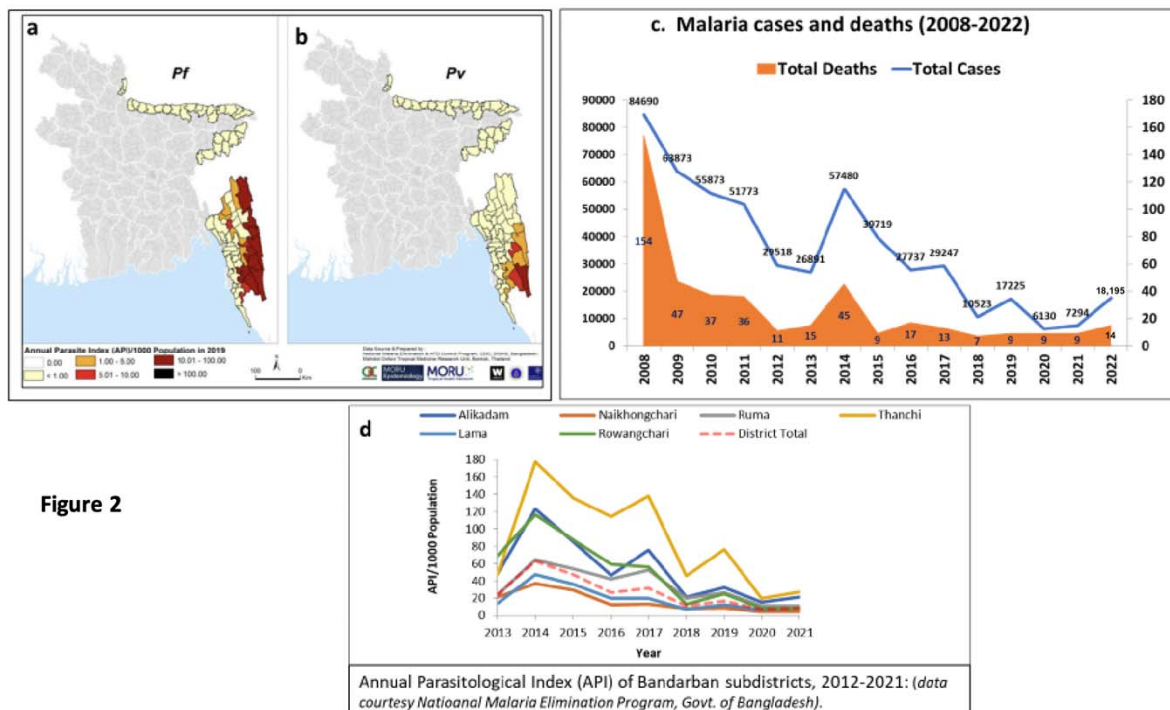

Figure 2

510

511 **Figure 2. Dynamics of malaria control in Bangladesh.** a-b, Phased malaria elimination in Bangladesh 2010-2030

512 for *P. falciparum* (Pf) and *P. vivax* (Pv); c, Malaria cases and deaths in Bangladesh 2008;-2020 d, Annual

513 Parasitological Index (API) 2013-2021 in sub-districts of Bandarban, the CHT district with highest levels of

514 malaria. (All data are courtesy of the National Malaria Elimination Program, Govt of Bangladesh).

515

516



528

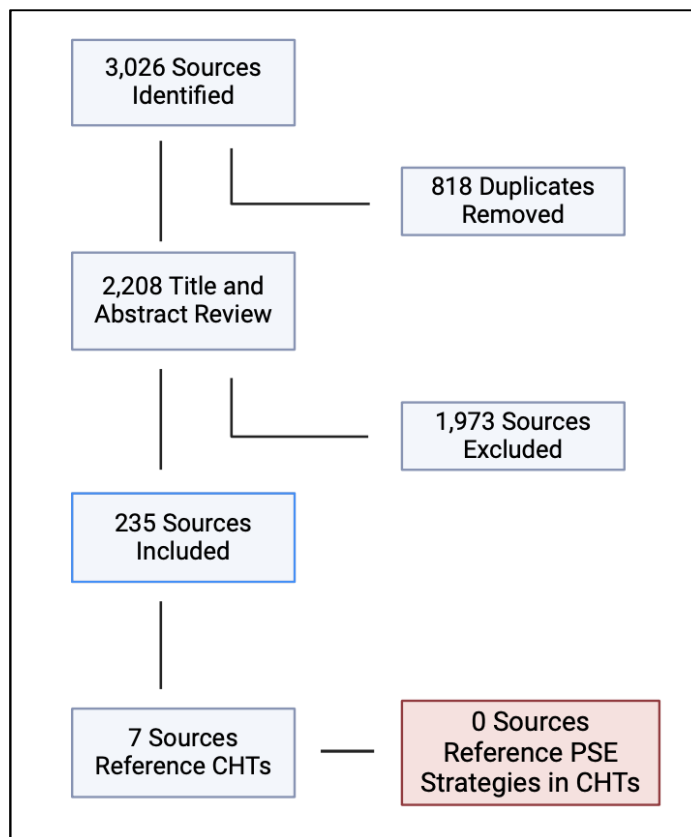

**Figure 3. Absence of Literature on PSE in the CHTs.** A literature search was conducted with Google Scholar to analyze the state of literature on private sector engagement (PSE) in the Chittagong Hill Tracts (CHTs). Searches of the white and grey literature revealed 3,026 sources, from which 818 duplicates were removed, leaving 2,208 deduplicated sources which proceeded to title and abstract screening. Of these, 1,973 sources did not meet the inclusion criteria and were excluded, leaving 235 sources which were included in the study. Further analysis revealed that only 7 of these sources referenced the CHTs, and none of those referenced for-profit PSE strategies in the context of the CHTs, demonstrating an area of high unmet need in the literature. Created using biorender.com.

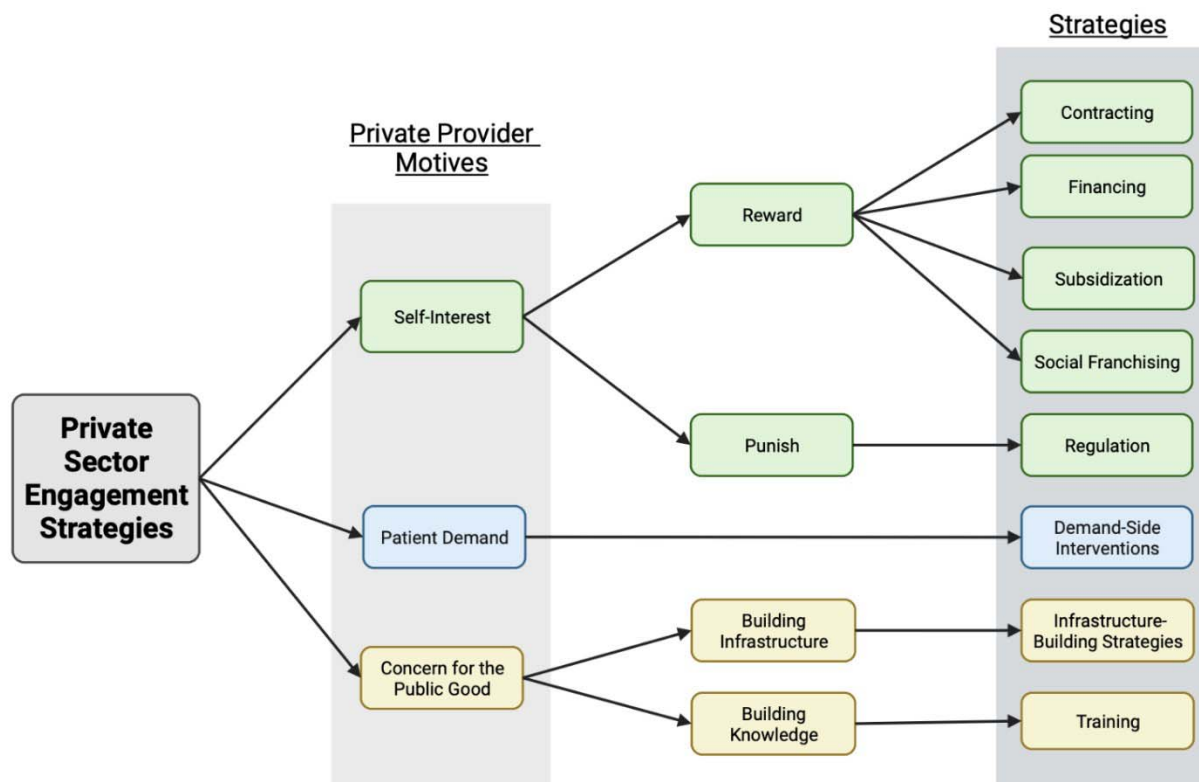

529

530 **Figure 4. Potential PSE Strategies for PHPs in Bangladesh.** Based on a review of private sector engagement  
531 (PSE) in the literature (see Methods and Fig. 3), 8 potential strategies for PSE in the context of malaria elimination  
532 were revealed: contracting, financing, subsidization, social franchising, regulation, demand-side interventions,  
533 infrastructure-building strategies, and training. A review of the Bangladeshi private healthcare sector revealed three  
534 primary motivators for private healthcare providers: provider self-interest, patient demand, and altruism (concern for  
535 patient good). Four mechanisms (reward, punish, building infrastructure, building knowledge) that connect  
536 strategies to motivation are also shown. Created with biorender.com.

537

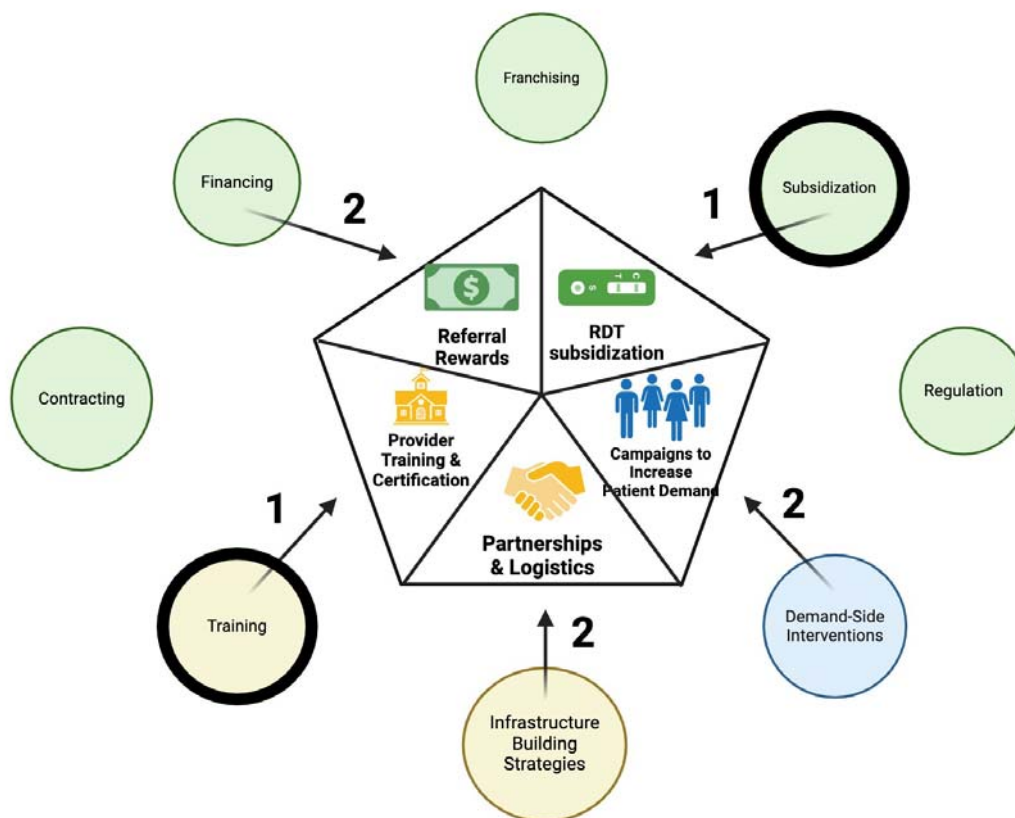

538  
539 **Figure 5. Model for PSE in Bangladesh.** Matching the analysis of the success levels of individual strategies in the  
540 literature with the context of malaria elimination in Bangladesh, we created a stepped, multi-modal recommendation  
541 model for Bangladesh. This model targeted all three modes of provider motivation, including referral rewards  
542 financing and RDT subsidization for providers motivated by self-interest; campaigns to increase patient demand for  
543 providers motivated by patient demand; and training and the formation of partnerships and logistics for providers  
544 motivated by concern for the public good. The stepped feature accommodates phased elimination strategy of the  
545 National Malaria Elimination Program and conditions in high endemic districts of the CHTs, where there is urgent  
546 need to decrease malaria levels but the number of private providers maybe lower and a larger majority may be  
547 informal providers. Here close attention should be paid to the first step (1): training (of providers to conduct  
548 diagnosis with) subsidized RDT (both strategies are encircled in black bands) as well as enter data into formats  
549 needed by the national program. Success in utilization of RDT could be followed (2) with infrastructure support that  
550 can be supported by local resources of providers or the national program as well as referral financing and demand  
551 side intervention, to support networks that emerge between the patient community, private provider and NMEP.  
552 Created with biorender.com.

553

554

555 **Author Contributions:**

556 Ryan McArdle: Conceptualization, Investigation, Methodology, Visualization, Writing – Original  
557 Draft, Writing – Review and Editing

558 Ching Swe Phru: Project Administration, Supervision

559 Mohammad Sharif Hossain: Project Administration, Supervision

560 Mohammad Shafiul Alam: Conceptualization, Project Administration, Supervision, Writing –  
561 review and editing

562 Kasturi Haldar: Conceptualization, Funding Acquisition, Supervision, Project Administration,  
563 Visualization, Writing – Original Draft, Writing – Review and Editing

564

565

566 **Works Cited:**

567 1 World Health Organization. World malaria report 2022. Geneva: WHO; 2022.

568 <https://www.who.int/teams/global-malaria-programme/reports/world-malaria-report-2022>

569 2 Rahman MM. Insecticide substitutes for DDT to control mosquitoes may be causes of several  
570 diseases. *Environ Sci Pollut Res* 2013; 20: 2064-9. DOI:10.1007/s11356-012-1145-0.

571 3 National Malaria Elimination Programme, Government of Bangladesh. National Strategic  
572 Plan for Malaria Elimination in Bangladesh: 2021-2025. Dhaka: NMEP; 2021.

573 [https://apmen.org/sites/default/files/all\\_resources/National%20Strategic%20Plan\\_Malaria%20Elimination\\_Bangladesh\\_2021-2025.pdf](https://apmen.org/sites/default/files/all_resources/National%20Strategic%20Plan_Malaria%20Elimination_Bangladesh_2021-2025.pdf)

575 4 Matin MA, Sarkar NDP, Phru CS, et al. Precarity at the Margins of Malaria Control in the  
576 Chittagong Hill Tracts in Bangladesh: A Mixed-Methods Study. *Pathogens (Basel)* 2020; 9:  
577 840. DOI:10.3390/pathogens9100840.

578 5 Galagan SR, Prue CS, Khyang J, et al. The practice of jhum cultivation and its relationship to  
579 Plasmodium falciparum infection in the Chittagong Hill Districts of Bangladesh. *The*  
580 *American journal of tropical medicine and hygiene* 2014; 91: 374-83. DOI:10.4269/ajtmh.13-  
581 0592.

- 582 6 Sinha I, Sayeed AA, Uddin D, et al. Mapping the travel patterns of people with malaria in  
583 Bangladesh. *BMC Medicine* 2020; 18: 45. DOI:10.1186/s12916-020-1512-5.
- 584 7 Haldar K, Alam MS, Koepfli C, et al. Bangladesh in the era of malaria elimination. *Trends in*  
585 *parasitology*. DOI:10.1016/j.pt.2023.06.009.
- 586 8 Potter R, Tesfazghi K, Poyer S, et al. Private Sector Contributions to National Malaria  
587 Surveillance Systems in Elimination Settings: Lessons Learned from Cambodia, Lao PDR,  
588 Myanmar, and Vietnam. *The American journal of tropical medicine and hygiene* 2023; 108:  
589 1423. DOI:10.4269/ajtmh.22-0147.
- 590
- 591 9 Bennett A, Avanceña ALV, Wegbreit J, et al. Engaging the private sector in malaria  
592 surveillance: a review of strategies and recommendations for elimination settings. *Malaria*  
593 *Journal* 2017; 16: 252. DOI:10.1186/s12936-017-1901-1.
- 594 10 Bhuiya A Editor. *Health for the Rural Masses: Insights from Chakaria*. Dhaka: ICDDR,B,  
595 2009.  
596 <https://assets.publishing.service.gov.uk/media/57a08b63ed915d622c000c65/FHSbookHealthforRuralMasses.pdf>  
597
- 598 11 Hopkins DR and Ruiz-Tiben E. Surveillance for Dracunculiasis, 1981–1991. *MMWR*.  
599 *Surveillance summaries* 1992; 41: 1-13. <https://www.jstor.org/stable/24675632>
- 600 12 Cohen JM. “Remarkable solutions to impossible problems”: lessons for malaria from the  
601 eradication of smallpox 2019; 18: 323. DOI:10.1186/s12936-019-2956-y.
- 602 13 Chowdhury AMR, Ahmed YH, Islam K, et al. *50 years of Bangladesh: Advances in Health*.  
603 Dhaka: University Press Ltd, 2023.
- 604 14 Government of the People's Republic of Bangladesh. Communicable Diseases (Prevention,  
605 Control and Eradication) Act, 2018 (Act No. 61 of 2018). Dhaka: MOHFW; 2018.  
606 [http://www.mohfw.gov.bd/index.php?option=com\\_docman&task=doc\\_download&gid=25564](http://www.mohfw.gov.bd/index.php?option=com_docman&task=doc_download&gid=25564&lang=en)  
607 [&lang=en](http://www.mohfw.gov.bd/index.php?option=com_docman&task=doc_download&gid=25564&lang=en)
- 608 15 World Health Organization. Preparing for Certification of Malaria Elimination, Second  
609 Edition. Geneva: WHO; 2022. <https://www.who.int/publications/i/item/9789240062009>
- 610 16 Onoka CA, Onwujekwe OE, Hanson K, et al. Sub-optimal delivery of intermittent preventive  
611 treatment for malaria in pregnancy in Nigeria: influence of provider factors. *Malaria Journal*  
612 2012; 11: 317. DOI:10.1186/1475-2875-11-317.
- 613 17 Bramer W. *Serving Evidence Syntheses: Improving literature retrieval in systematic reviews*.  
614 Rotterdam: Erasmus University Rotterdam; 2019. <http://hdl.handle.net/1765/120107>

- 615 18 Shah NM, Brieger WR and Peters DH. Can interventions improve health services from  
616 informal private providers in low and middle-income countries? A comprehensive review of  
617 the literature. *Health policy and planning* 2011; 26: 275-87. DOI:10.1093/heapol/czq074.
- 618 19 Montagu D, Goodman C, Berman P, et al. Recent trends in working with the private sector to  
619 improve basic healthcare. *Health policy and planning* 2016; 31: 1117-32.  
620 DOI:10.1093/heapol/czw018.
- 621 20 Adams AM, Ahmed R, Shuvo TA, et al. Exploratory qualitative study to understand the  
622 underlying motivations and strategies of the private for-profit healthcare sector in urban  
623 Bangladesh. *BMJ Open* 2019; 9: e026586. DOI:10.1136/bmjopen-2018-026586.
- 624 21 Waters H, Hatt L and Peters D. Working with the private sector for child health. *Health policy  
625 and planning* 2003; 18: 127-37. DOI:10.1093/heapol/czg017.
- 626 22 Brown M, Bouanchaud P, Tesfazghi K, et al. Motivation to test, treat, and report malaria  
627 cases: a quantitative assessment among private sector providers in the Greater Mekong  
628 Subregion. *Malaria journal* 2022; 21: 82. DOI:10.1186/s12936-022-04108-7.
- 629 23 Marek T, Diallo I, Ndiaye B, et al. Successful contracting of prevention services: fighting  
630 malnutrition in Senegal and Madagascar. *Health policy and planning* 1999; 14: 382-9.  
631 DOI:10.1093/heapol/14.4.382.
- 632 24 Loevinsohn B and Harding A. Buying results? Contracting for health service delivery in  
633 developing countries. *The Lancet (British edition)* 2005; 366: 676-81.  
634 DOI:10.1016/S01406736(05)67140-1.
- 635 25 Heard A, Nath DK and Loevinsohn B. Contracting urban primary healthcare services in  
636 Bangladesh – effect on use, efficiency, equity and quality of care. *Tropical medicine &  
637 international health* 2013; 18: 861-70. DOI:10.1111/tmi.12113.
- 638 26 White H. Maintaining momentum to 2015?: an impact evaluation of interventions to improve  
639 maternal and child health and nutrition in Bangladesh 1st ed. Washington, DC: World Bank;  
640 2005. [http://documents.worldbank.org/curated/en/683211468006046063/Maintaining-](http://documents.worldbank.org/curated/en/683211468006046063/Maintaining-momentum-to-2015-an-impact-evaluation-of-interventions-to-improve-maternal-and-child-health-and-nutrition-in-Bangladesh)  
641 [momentum-to-2015-an-impact-evaluation-of-interventions-to-improve-maternal-and-child-](http://documents.worldbank.org/curated/en/683211468006046063/Maintaining-momentum-to-2015-an-impact-evaluation-of-interventions-to-improve-maternal-and-child-health-and-nutrition-in-Bangladesh)  
642 [health-and-nutrition-in-Bangladesh](http://documents.worldbank.org/curated/en/683211468006046063/Maintaining-momentum-to-2015-an-impact-evaluation-of-interventions-to-improve-maternal-and-child-health-and-nutrition-in-Bangladesh)
- 643 27 Odendaal WA, Ward K, Uneke J, et al. Contracting out to improve the use of clinical health  
644 services and health outcomes in low□ and middle□ income countries. *Cochrane database of  
645 systematic reviews* 2018; 2018: CD008133. DOI:10.1002/14651858.CD008133.pub2.
- 646 28 Liu X, Hotchkiss DR and Bose S. The effectiveness of contracting-out primary health care  
647 services in developing countries: a review of the evidence. *Health policy and planning* 2008;  
648 23: 1-13. DOI:10.1093/heapol/czm042.

- 649 29 Peters DH, Mirchandani GG and Hansen PM. Strategies for engaging the private sector in  
650 sexual and reproductive health: how effective are they?. *Health policy and planning* 2004; 19:  
651 i5-i21. DOI:10.1093/heapol/czh041.
- 652 30 Menya D, Platt A, Manji I, et al. Using pay for performance incentives (P4P) to improve  
653 management of suspected malaria fevers in rural Kenya: a cluster randomized controlled trial.  
654 *BMC Medicine* 2015; 13: 268. DOI:10.1186/s12916-015-0497-y.
- 655 31 Eijkenaar F, Emmert M, Scheppach M, et al. Effects of pay for performance in health care: A  
656 systematic review of systematic reviews. *Health policy (Amsterdam)* 2013; 110: 115-30.  
657 DOI:10.1016/j.healthpol.2013.01.008.
- 658 32 de Walque D, Robyn PJ, Saidou H, et al. Looking into the performance-based financing black  
659 box: evidence from an impact evaluation in the health sector in Cameroon. *Health policy and  
660 planning* 2021; 36: 835-47. DOI:10.1093/heapol/czab002.
- 661 33 Witter S, Fretheim A, Kessy FL, et al. Paying for performance to improve the delivery of  
662 health interventions in low- and middle-income countries. *Cochrane database of systematic  
663 reviews* 2012; 2013: CD007899. DOI:10.1002/14651858.CD007899.pub2.
- 664 34 Diaconu K, Witter S, Binyaruka P, et al. Appraising pay-for-performance in healthcare in low-  
665 and middle-income countries through systematic reviews: reflections from two teams.  
666 *Cochrane database of systematic reviews* 2022; 5: ED000157.  
667 DOI:10.1002/14651858.ED000157.  
668
- 669 35 Kondo KK, Damberg CL, Mendelson A, et al. Implementation Processes and Pay for  
670 Performance in Healthcare: A Systematic Review. *J Gen Intern Med* 2016; 31: 61-9.  
671 DOI:10.1007/s11606-015-3567-0.
- 672 36 Van Herck P, De Smedt D, Annemans L, et al. Systematic review: Effects, design choices, and  
673 context of pay-for-performance in health care. *BMC Health Services Research* 2010; 10: 247.  
674 DOI:10.1186/1472-6963-10-247.
- 675 37 Chiang CY, Enarson DA, Yang SL, et al. The impact of national health insurance on the  
676 notification of tuberculosis in Taiwan. *The international journal of tuberculosis and lung  
677 disease* 2002; 6: 974-9.
- 678 38 Garcia P, Hughes J, Carcamo C, et al. Training pharmacy workers in recognition,  
679 management, and prevention of STDs: district-randomized controlled trial. *Bulletin of the  
680 World Health Organization* 2003; 81: 806-14. DOI:10.1590/S0042-96862003001100007.
- 681 39 Senyonjo L, Downs P, Schmidt E, et al. Lessons learned for surveillance strategies for  
682 trachoma elimination as a public health problem, from the evaluation of approaches utilised  
683 by Guinea worm and onchocerciasis programmes: A literature review. *PLoS neglected  
684 tropical diseases* 2021; 15: e0009082. DOI:10.1371/journal.pntd.0009082.

- 685 40 Vo LNQ, Codlin AJ, Huynh HB, et al. Enhanced Private Sector Engagement for Tuberculosis  
686 Diagnosis and Reporting through an Intermediary Agency in Ho Chi Minh City, Viet Nam.  
687 *Tropical medicine and infectious disease* 2020; 5: 143. DOI:10.3390/tropicalmed5030143.
- 688 41 Wells WA, Uplekar M and Pai M. Achieving Systemic and Scalable Private Sector  
689 Engagement in Tuberculosis Care and Prevention in Asia. *PLoS Medicine* 2015; 12:  
690 e1001842. DOI:10.1371/journal.pmed.1001842.
- 691 42 Chakravarthi I. Regulation of Private Health Care Providers in India: Current Status, Future  
692 Directions. *Indian Journal of Public Administration* 2018; 64: 587-98.  
693 DOI:10.1177/0019556118780093.
- 694 43 Stetson B, Syhakhang L, Lundborg CS, et al. Private pharmacy practice and regulation: A  
695 randomized trial in Lao P.D.R. *International journal of technology assessment in health care*  
696 2001; 17: 579-89. DOI:10.1017/s0266462301107129.
- 697 44 Sheikh K, Saligram PS and Hort K. What explains regulatory failure? Analysing the  
698 architecture of health care regulation in two Indian states. *Health policy and planning* 2015;  
699 30: 39-55. DOI:10.1093/heapol/czt095.
- 700 45 Montagu D, Dr and Goodman C, PhD. Prohibit, constrain, encourage, or purchase: how  
701 should we engage with the private health-care sector?. *The Lancet (British edition)* 2016; 388:  
702 613-21. DOI:10.1016/S0140-6736(16)30242-2.
- 703 46 Morgan R, Dr, Ensor T, Prof and Waters H, PhD. Performance of private sector health care:  
704 implications for universal health coverage. *The Lancet (British edition)* 2016; 388: 606-12.  
705 DOI:10.1016/S0140-6736(16)00343-3.
- 706 47 Rahman R. The State, the Private Health Care Sector and Regulation in Bangladesh. *Asia*  
707 *Pacific journal of public administration* 2007; 29: 191-206.  
708 DOI:10.1080/23276665.2007.10779334.
- 709 48 Wafula F, Molyneux C, Mackintosh M, et al. Protecting the public or setting the bar too high?  
710 Understanding the causes and consequences of regulatory actions of front-line regulators and  
711 specialized drug shop operators in Kenya. *Social Science & Medicine (1982)* 2013; 97: 220-7.  
712 DOI:10.1016/j.socscimed.2013.08.020.
- 713 49 Hanson K, Goodman C, Tougher S, et al. Independent Evaluation of Phase 1 of the Affordable  
714 Medicines Facility - malaria (AMFm), Multi-Country Independent Evaluation Final Report.  
715 London: Amfm Independent Evaluation Team; 2012. [https://unitaid.org/assets/Mid-term-  
716 evaluation-Affordable-medicines-for-malaria-facility-AMFm-Phase-1.pdf](https://unitaid.org/assets/Mid-term-evaluation-Affordable-medicines-for-malaria-facility-AMFm-Phase-1.pdf)
- 717 50 Kamal-Yanni M. Salt, Sugar, and Malaria Pills: How the Affordable Medicine Facility-  
718 malaria endangers public health. Warwick, UK: Oxfam Policy and Practice; 2012.  
719 <https://policy-practice.oxfam.org/resources/salt-sugar-and-malaria-pills-how-the-affordable->



- 720 medicine-facilitymalaria-endang-249615/#:~:text=Summary%20(261%20KB)-  
721 ,Overview,it%20has%20served%20poor%20people.
- 722 51 Morris A, Ward A, Moonen B, et al. Price subsidies increase the use of private sector ACTs:  
723 evidence from a systematic review. *Health Policy and Planning* 2015; 30: 397-405.  
724 DOI:10.1093/heapol/czu013.
- 725 52 Ansah EK, Narh-Bana S, Affran-Bonful H, et al. The impact of providing rapid diagnostic  
726 malaria tests on fever management in the private retail sector in Ghana: a cluster randomized  
727 trial. *BMJ (Online)* 2015; 350: h1019. DOI:10.1136/bmj.h1019.
- 728 53 Visser T, Bruxvoort K, Maloney K, et al. Introducing malaria rapid diagnostic tests in private  
729 medicine retail outlets: A systematic literature review. *PLoS ONE* 2017; 12: e0173093.  
730 DOI:10.1371/journal.pone.0173093.
- 731 54 Cohen J, Dupas P and Schaner S. Price Subsidies, Diagnostic Tests, and Targeting of Malaria  
732 Treatment: Evidence from a Randomized Controlled Trial. *American Economic Review* 2015;  
733 105: 609-45. DOI:10.1257/aer.20130267.
- 734 55 Laktabai J, Saran I, Zhou Y, et al. Subsidise the test, the treatment or both? Results of an  
735 individually randomised controlled trial of the management of suspected malaria fevers in the  
736 retail sector in western Kenya. *BMJ global health* 2020; 5: e003378. DOI:10.1136/bmjgh-  
737 2020003378.
- 738 56 Lussiana C. Towards subsidized malaria rapid diagnostic tests. Lessons learned from  
739 programmes to subsidise artemisinin-based combination therapies in the private sector.  
740 *Health Policy and Planning* 2016; 31: 928-39. DOI:10.1093/heapol/czv028.
- 741 57 O'Connell K, Hom M, Aung T, et al. Using and Joining a Franchised Private Sector Provider  
742 Network in Myanmar. *PLoS ONE* 2011; 6: e28364. DOI:10.1371/journal.pone.0028364.
- 743 58 Cumberland DM and Litalien BC. Social franchising: A systematic review. *Journal of*  
744 *marketing channels* 2018; 25: 137-56. DOI:10.1080/1046669X.2019.1657757.
- 745 59 Beyeler N, York De La Cruz A and Montagu D. The Impact of Clinical Social Franchising on  
746 Health Services in Low- and Middle-Income Countries: A Systematic Review. *PLoS ONE*  
747 2013; 8: e60669. DOI:10.1371/journal.pone.0060669.
- 748 60 Haemmerli M, Santos A, Penn-Kekana L, et al. How equitable is social franchising? Case  
749 studies of three maternal healthcare franchises in Uganda and India. *Health Policy and*  
750 *Planning* 2018; 33: 411-9. DOI:10.1093/heapol/czx192.
- 751 61 World Health Organization. Quality and accreditation in health care services: a global review.  
752 Geneva: Evidence and Information for Policy, Department of Health Service Provision,  
753 WHO; 2003. [https://www.supersalud.gob.cl/observatorio/671/articles-14453\\_recurso\\_1.pdf](https://www.supersalud.gob.cl/observatorio/671/articles-14453_recurso_1.pdf)

- 754 62 Alkhenizan A and Shaw C. Impact of Accreditation on the Quality of Healthcare Services: a  
755 Systematic Review of the Literature. *Annals of Saudi Medicine* 2011; 31: 407-16.  
756 DOI:10.4103/0256-4947.83204.
- 757 63 Hurst TE, Semrau K, Patna M, et al. Demand-side interventions for maternal care: evidence  
758 of more use, not better outcomes. *BMC Pregnancy and Childbirth* 2015; 15: 297.  
759 DOI:10.1186/s12884-015-0727-5.
- 760 64 Kiragu M, Fonner VA, Munyuwiny S, et al. Does Capacity Development Increase Demand  
761 for Health Services and Rights Among Key Populations Affected by HIV? A Systematic  
762 Review of Evidence from Low and Middle-Income Countries. *AIDS Behav* 2020; 24: 2268-  
763 81. DOI:10.1007/s10461-020-02936-9.
- 764 65 Omedo M, Ogutu M, Awiti A, et al. The Effect of a Health Communication Campaign on  
765 Compliance with Mass Drug Administration for Schistosomiasis Control in Western Kenya—  
766 The SCORE Project. *The American journal of tropical medicine and hygiene* 2014; 91: 982-8.  
767 DOI:10.4269/ajtmh.14-0136.
- 768 66 Naugle DA and Hornik RC. Systematic Review of the Effectiveness of Mass Media  
769 Interventions for Child Survival in Low- and Middle-Income Countries. *Journal of Health  
770 Communication* 2014; 19: 190-215. DOI:10.1080/10810730.2014.918217.
- 771 67 Beck DC, Munro-Kramer ML and Lori JR. A scoping review on community mobilisation for  
772 maternal and child health in sub-Saharan Africa: Impact on empowerment. *Global public  
773 health* 2019; 14: 375-95. DOI:10.1080/17441692.2018.1516228.
- 774 68 Tiruneh GT, Shiferaw CB and Worku A. Effectiveness and cost-effectiveness of home-based  
775 postpartum care on neonatal mortality and exclusive breastfeeding practice in low-and-  
776 middleincome countries: a systematic review and meta-analysis. *BMC Pregnancy and  
777 Childbirth* 2019; 19: 507. DOI:10.1186/s12884-019-2651-6.
- 778 69 Jones RT, Tusting LS, Smith HMP, et al. The Role of the Private Sector in Supporting Malaria  
779 Control in Resource Development Settings. *The Journal of infectious diseases* 2020; 222:  
780 S701-8. DOI:10.1093/infdis/jiaa488.
- 781 70 Argaw MD, Woldegiorgis AG, Abate DT, et al. Improved malaria case management in formal  
782 private sector through public private partnership in Ethiopia: retrospective descriptive study.  
783 *Malaria Journal* 2016; 15: 352. DOI:10.1186/s12936-016-1402-7.
- 784 71 Seidman G, Atun R. Do changes to supply chains and procurement processes yield cost  
785 savings and improve availability of pharmaceuticals, vaccines or health products? A  
786 systematic review of evidence from low-income and middle-income countries. *BMJ global  
787 health*. 2017 Apr 1;2(2):e000243. DOI:10.1136/bmjgh-2016-000243.

- 788 72 Rao VB, Schellenberg D and Ghani AC. Overcoming health systems barriers to successful  
789 malaria treatment. *Trends in parasitology* 2013; 29: 164-80. DOI:10.1016/j.pt.2013.01.005.
- 790 73 Smith LA, Jones C, Meek S, et al. Review: Provider Practice and User Behavior Interventions  
791 to Improve Prompt and Effective Treatment of Malaria: Do We Know What Works?. *The*  
792 *American journal of tropical medicine and hygiene* 2009; 80: 326-35.  
793 DOI:10.4269/ajtmh.2009.80.326.
- 794 74 Kamal-Yanni MM, Potet J and Saunders PM. Scaling-up malaria treatment: a review of the  
795 performance of different providers. *Malaria Journal* 2012; 11: 414. DOI:10.1186/1475-2875-  
796 11414.
- 797 75 Bosch-Capblanch X and Marceau C. Training, supervision and quality of care in selected  
798 integrated community case management (iCCM) programmes: A scoping review of  
799 programmatic evidence. *Journal of Global Health* 2014; 4: 020403.  
800 DOI:10.7189/jogh.04.020403.
- 801  
802
